# Supplementary material for: A dye@MOF crystalline probe serving as a platform for ratiometric sensing of trichloroacetic acid (TCA), a carcinogen metabolite in human urine
Source: Royal Society of Chemistry journal article supplement (doi:10.1039/c9ce00924h), 2019-01-01
Supplement: c9ce00924h1.pdf [file c9ce00924h1.pdf]

## Supporting information

**A dye@MOF crystalline probe serving as a platform for ratiometric sensing of trichloroacetic acid (TCA), a carcinogen metabolite in human urine**

Bing-Hui Wang,<sup>a</sup> and Bing Yan<sup>\*a,b</sup>

<sup>a</sup> *School of Chemical Science and Engineering, Tongji University, Shanghai 200092, China*

<sup>b</sup> *School of Materials Science and Engineering, Liaocheng University, Liaocheng 252059, China*

\* Corresponding author: Email address: [byan@tongji.edu.cn](mailto:byan@tongji.edu.cn) (Bing Yan)

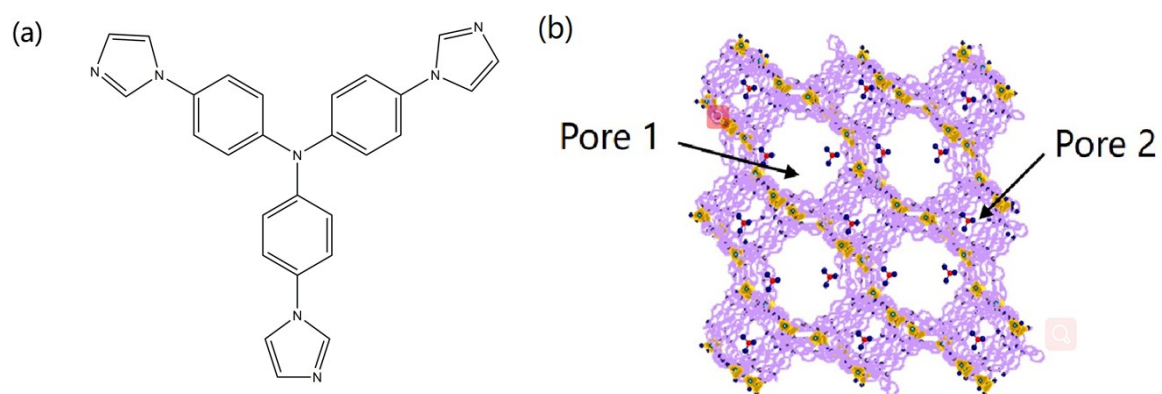

**Fig. S1** (a) The structure of Tipa ligand; (b) the framework of compound **1**. Green, red, purple, blue spheres represent Zn, O, C, N atoms, respectively.

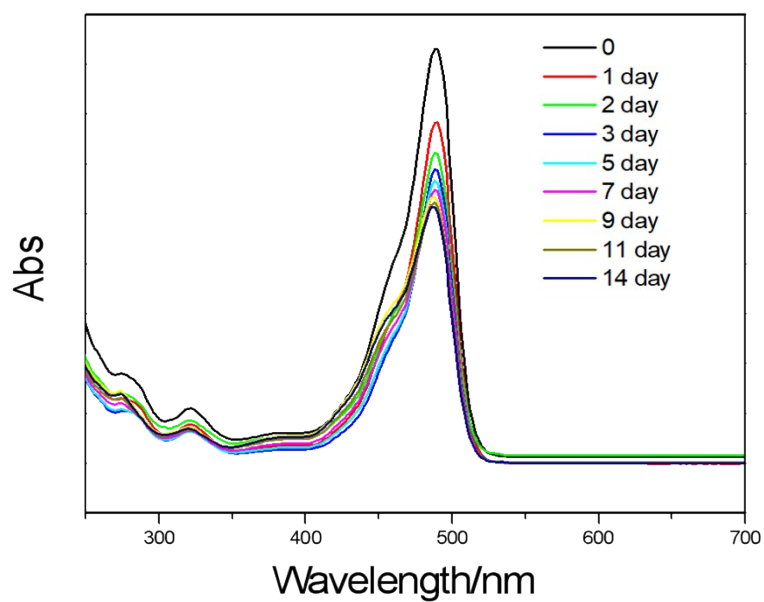

**Fig. S2** UV-vis absorption spectra of FS exchange solution.

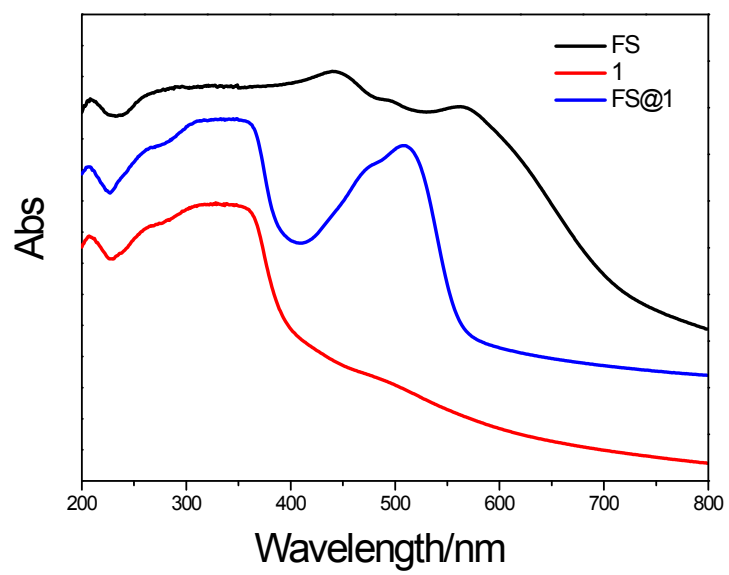

**Fig. S3** UV-vis diffuse reflectance spectra of FS, **1** and FS@**1**.

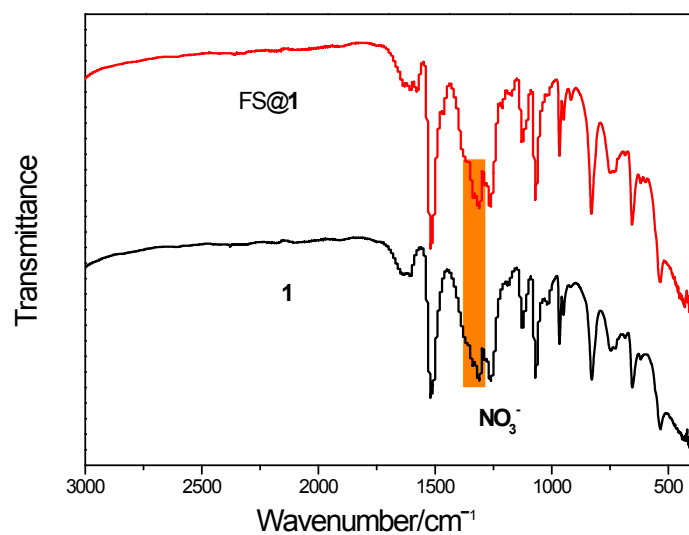

**Fig. S4** FTIR spectra analysis of compound **1** and FS@**1**.

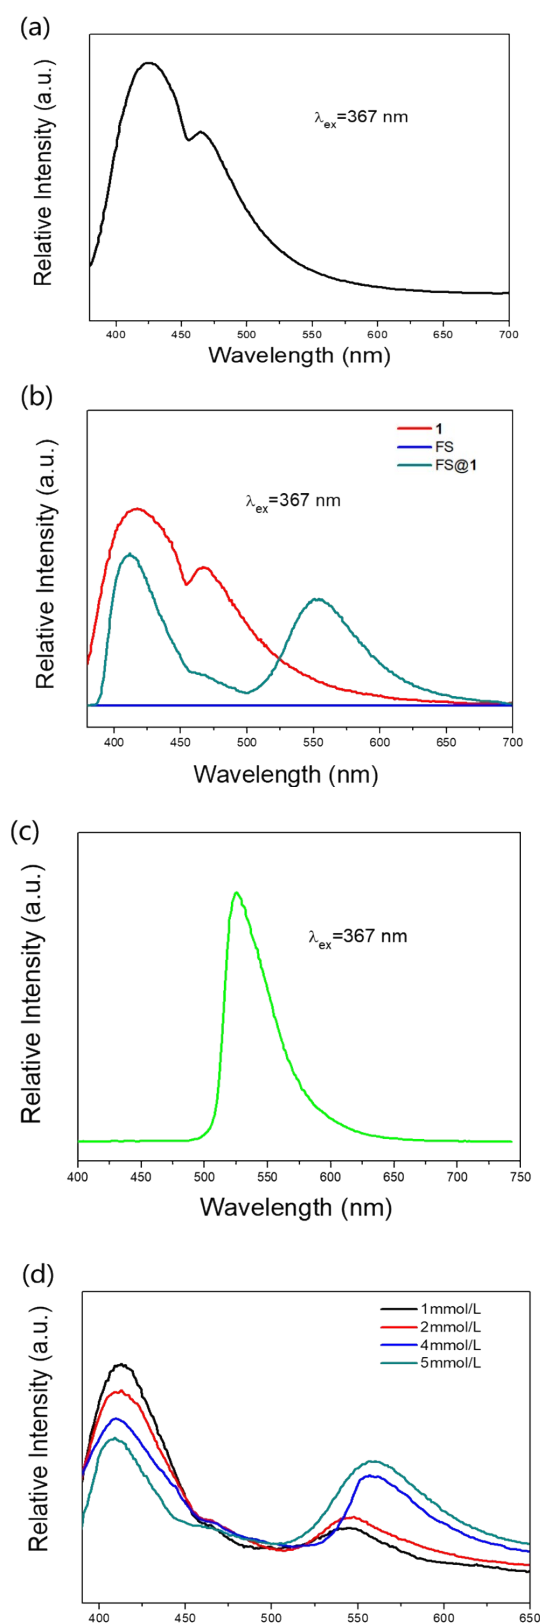

**Fig. S5** (a) emission spectra of free ligand Tipa in the solid state; (b) compound **1**, FS and FS@**1** in the solid state ; (c) FS in aqueous solution state; FS@**1** prepared by immersing in FS solution with different concentrations.

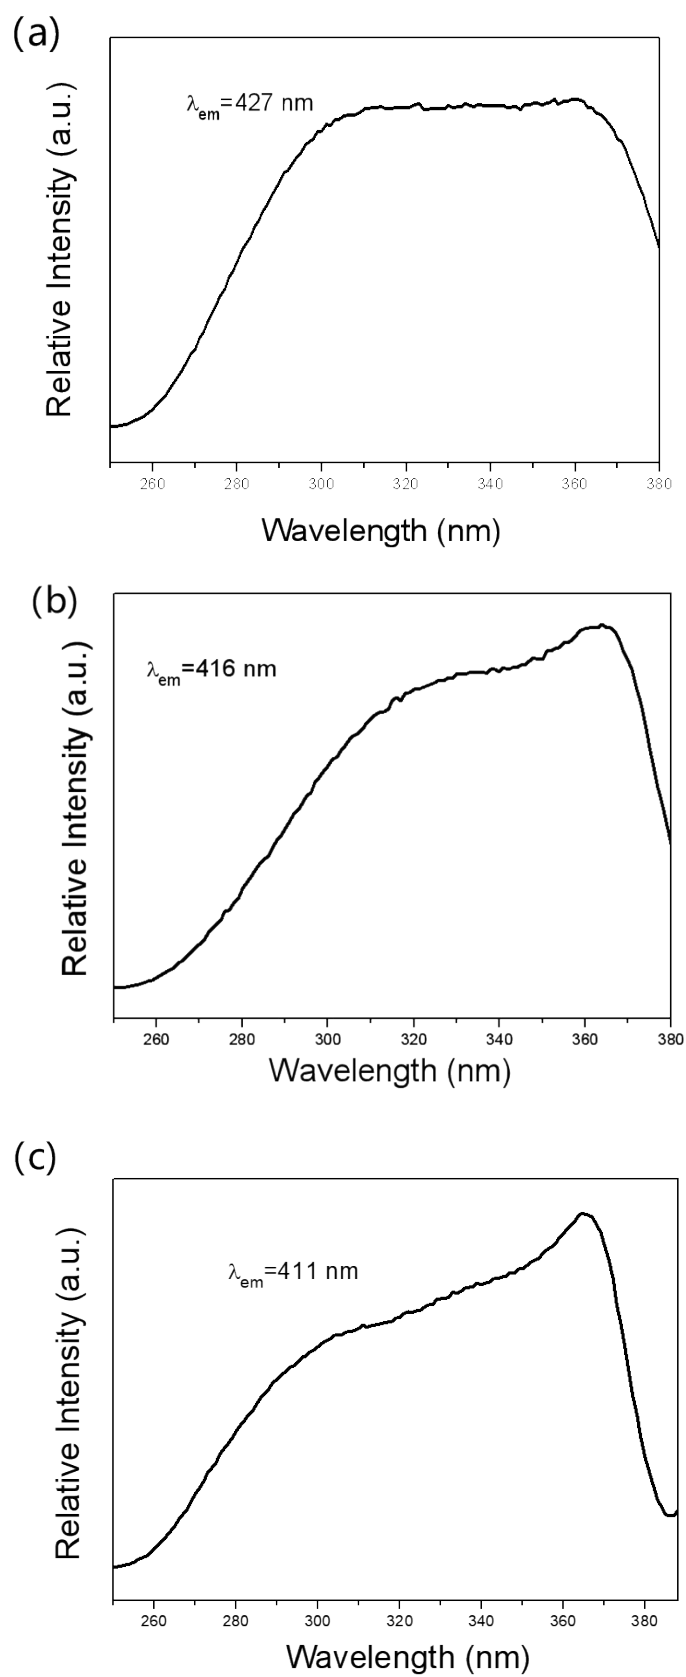

**Fig. S6** Excitation spectra of Tipa(a), compound **1**(b) and FS@**1**(c).

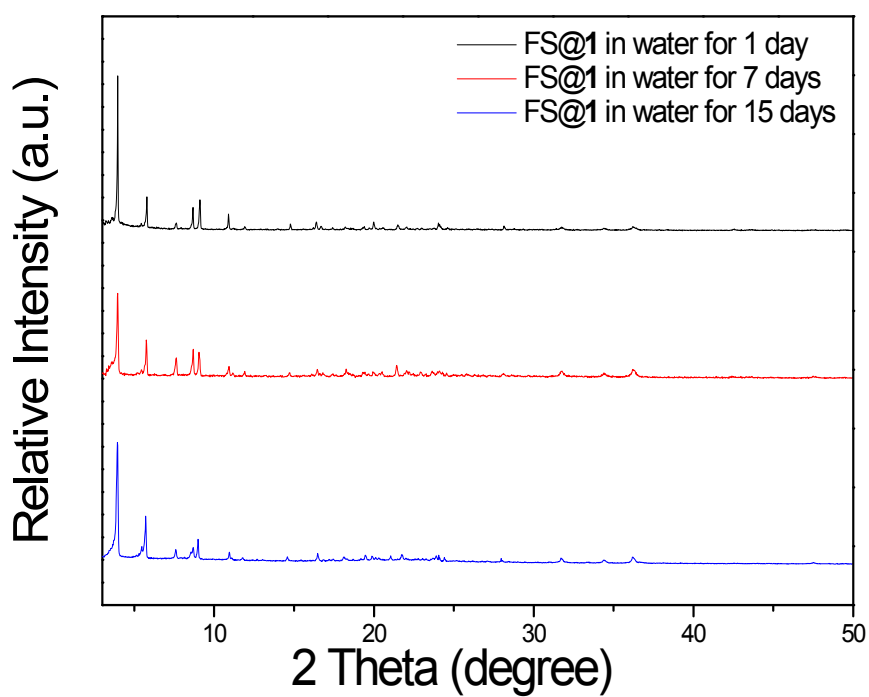

**Fig. S7** PXRD pattern of FS@1 after immersing in water for 1 day, 7days, 15 days, respectively.

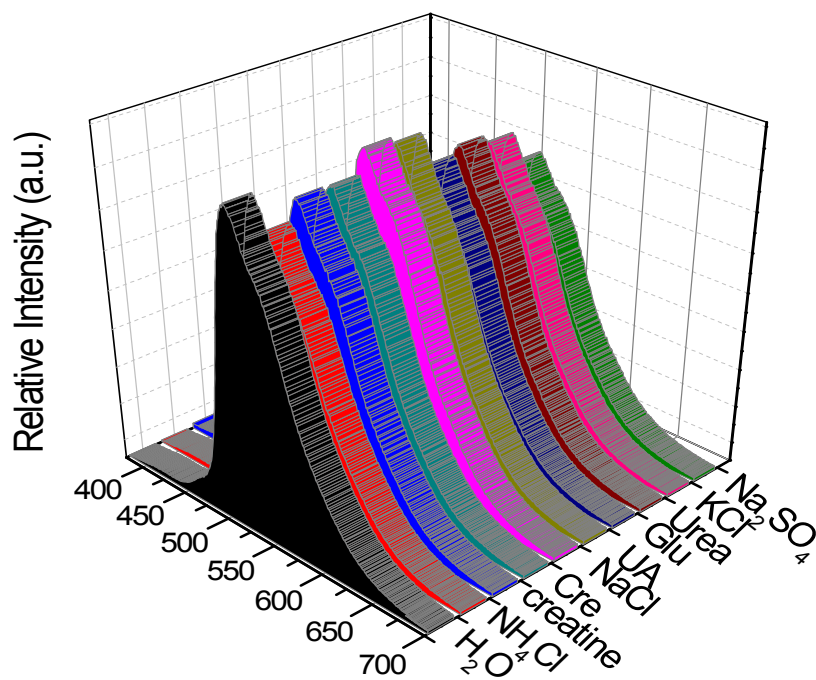

**Fig. S8** Emission spectra of FS@1 toward TCA in the presence of background of other various urine components ( $\lambda_{ex} = 367nm$ ).

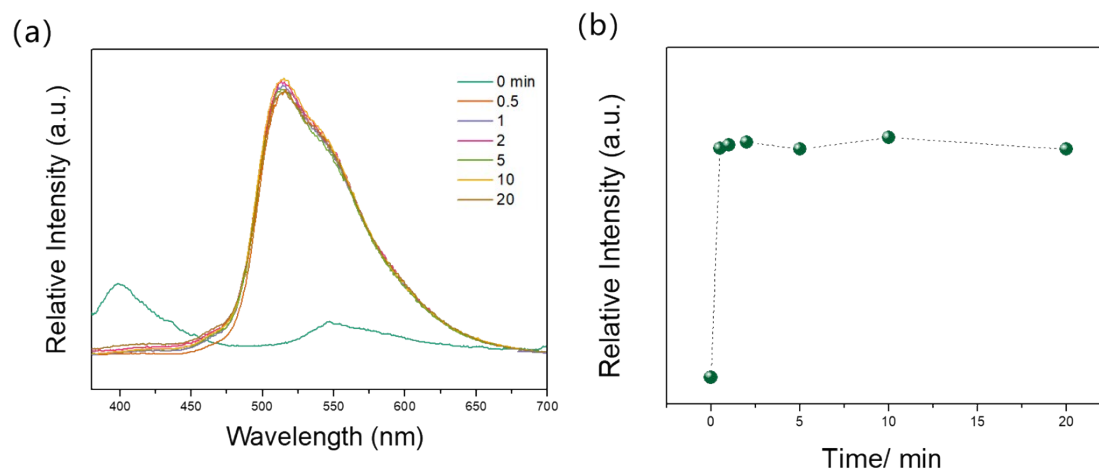

**Fig. S9** Time-dependent emission spectra(a) and intensities(b) at 518 nm of the FS@1 to the TCA solution.

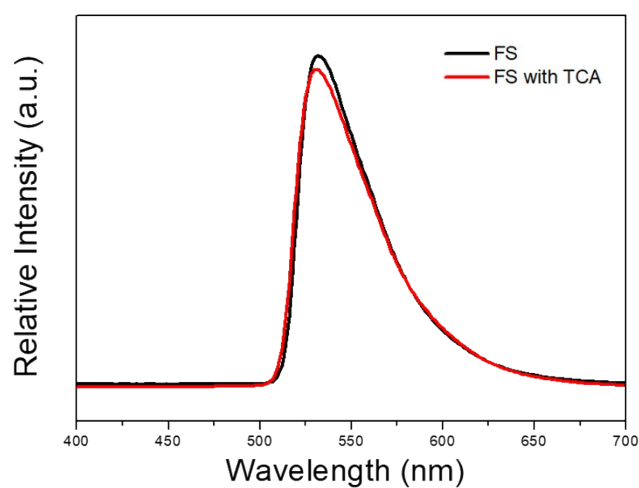

**Fig. S10** Emission spectra of FS solution and FS (in the same concentration) with TCA (10 mM).

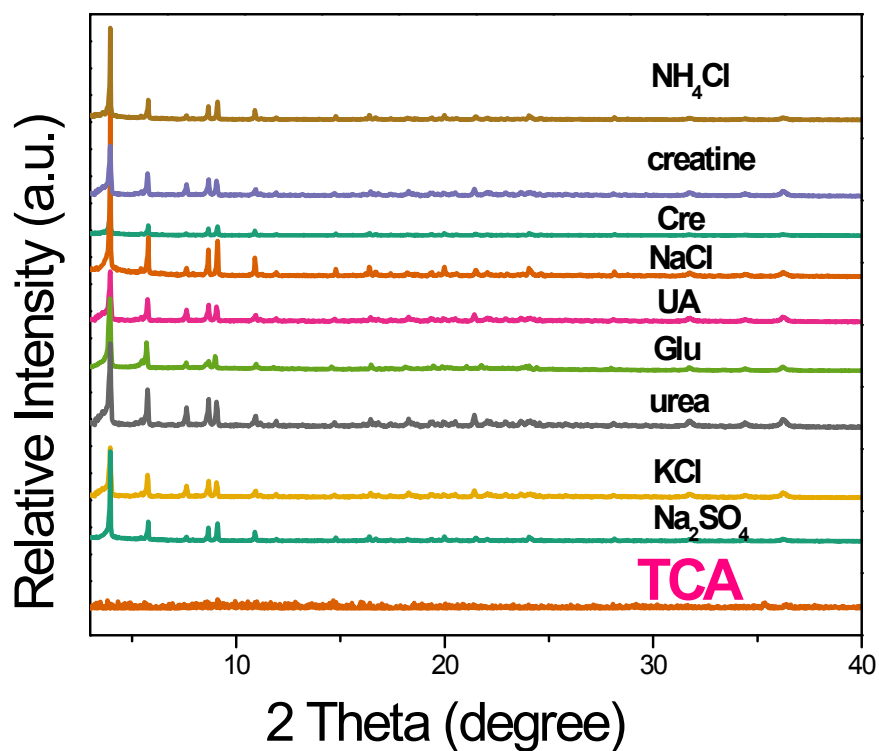

**Fig. S11** PXRD patterns of the FS@1 after immersing in different constituents(10 mM).

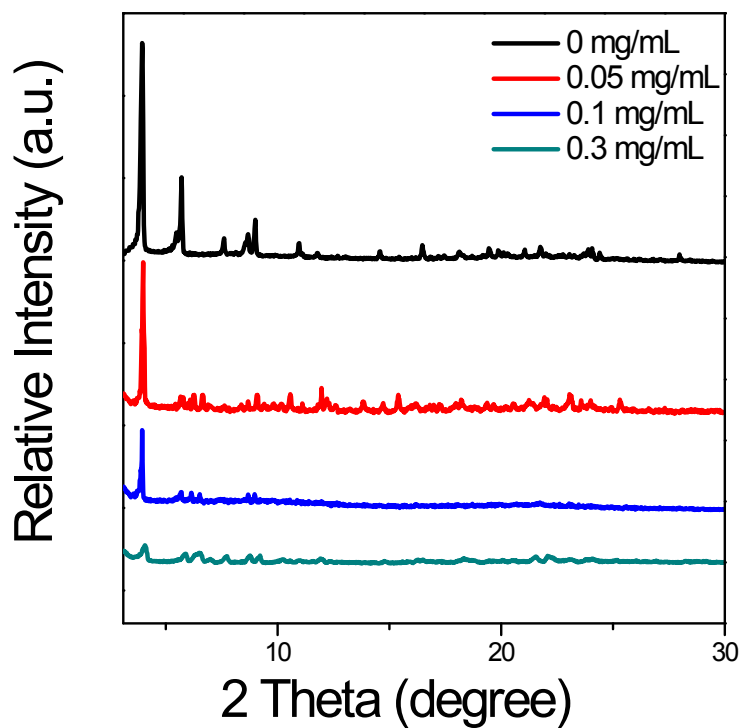

**Fig. S12** PXRD patterns of the FS@1 after immersing in TCA solution with different concentrations.
